# Supplementary material for: Mapping the immune environment in clear cell renal carcinoma by single-cell genomics
Source: PubMed Central journal article supplement (PMC7840906; doi:10.1038/s42003-020-01625-6), 2021-01-27
Supplement: 42003_2020_1625_MOESM3_ESM.pdf [file 42003_2020_1625_MOESM3_ESM.pdf]

## **Description of Additional Supplementary Files**

File Name: Supplementary Data 1

Description: VDJ clonotype assignments by single-cell barcodes

File Name: Supplementary Data 2

Description: 2 Differential genes comparing peripheral-blood and tumorinfiltrated CD4+ T cells

File Name: Supplementary Data 3

Description: Summary of mean and median features across integrated single-cell samples.

File Name: Supplementary Data 4

Description: Dimensional reduction inputs for CD8+ T Cells, CD4+ T cell and Myeloid cell analyses.

File Name: Supplementary Data 5

Description: Lineage-specific gene lists for cell type assignment.
